# Supplementary material for: Staphylococcus aureus Tolerance and Genomic Response to Photodynamic Inactivation
Source: PubMed Central journal article supplement (PMC7845598; doi:10.1128/msphere.00762-20), 2021-01-06
Supplement: mSphere.00762-20_sf004.pdf [file mSphere.00762-20_sf004.pdf]

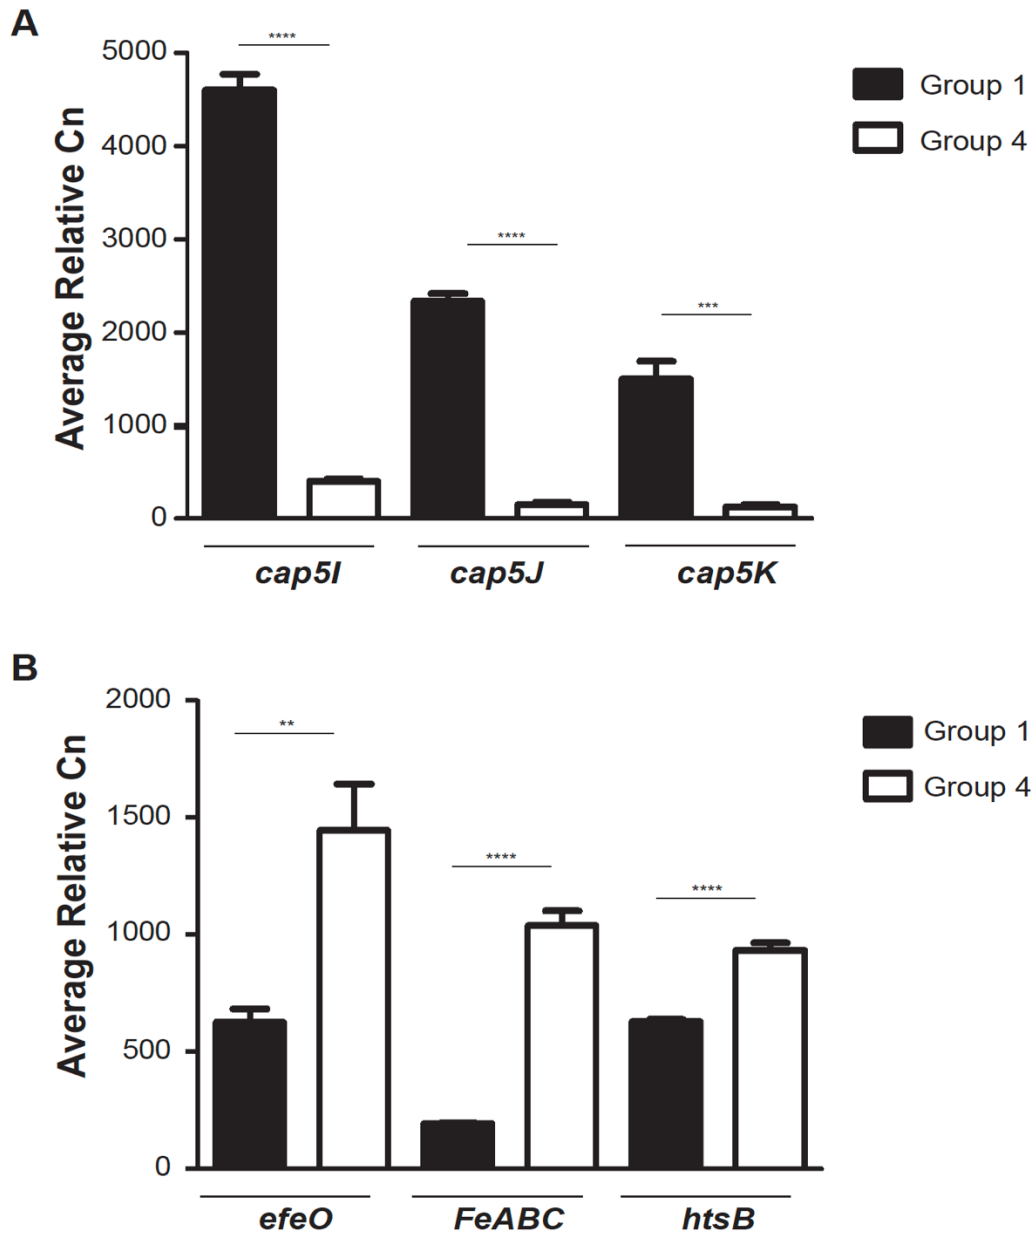

Figure S4. qRT-PCR indicate similar trends in differential expression of select genes.
